# Supplementary material for: Direct C–H arylation synthesis of (DD′AD′DA′)-constituted alternating polymers with low bandgaps and their photovoltaic performance
Source: Royal Society of Chemistry journal article supplement (doi:10.1039/c5nj00287g), 2015-01-01
Supplement: c5nj00287g1.pdf [file c5nj00287g1.pdf]

## Electronic Supplementary Information (ESI) for New Journal of Chemistry

# Direct C-H arylation synthesis of (DD`AD`DA`) constituted alternating polymers with low bandgaps and their photovoltaic performance

Mohamed Shaker, Cuc Kim Trinh, Won-Bin Kim, Heejoo Kim, Kwanghee Lee, Jae-Suk Lee\*

School of Materials Science & Engineering and Research Institute for Solar and Sustainable Energies (RISE), Heeger Center for Advanced Materials (HCAM), Gwangju Institute of Science and Technology, Gwangju 500-712, Korea.

## Contents

|                                                                   |    |
|-------------------------------------------------------------------|----|
| 1. The bulk heterojunction (BHJ) optimization .....               | S2 |
| 2. Absorption Coefficient spectra.....                            | S4 |
| 3. <sup>1</sup> H and <sup>13</sup> C NMR spectra of Monomer..... | S5 |
| 4. <sup>1</sup> H NMR spectra of polymers.....                    | S6 |

---

Corresponding author E-mail: [jslee@gist.ac.kr](mailto:jslee@gist.ac.kr)

Homepage: <https://mse.gist.ac.kr/~fps/>

## 1. The bulk heterojunction (BHJ) optimization

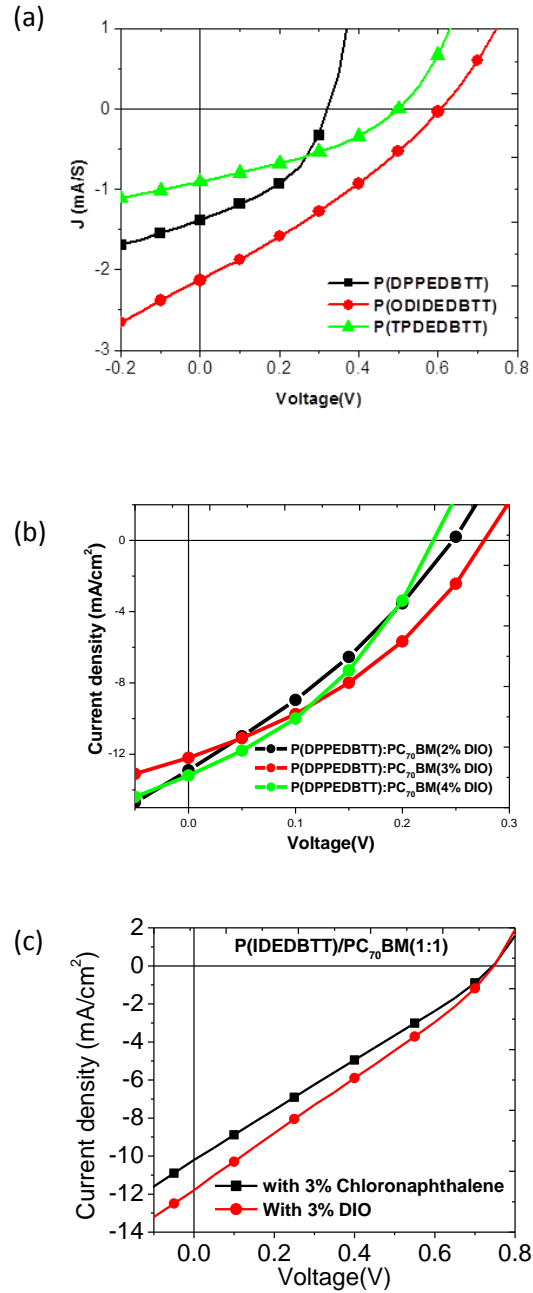

**Figure S1.** (a) Current density vs. voltage curves for OPV cells with the simple structure of ITO/PEDOT:PSS/polymer:PC<sub>60</sub>BM(1:1)/Al. (b) Current density vs. voltage characteristics of ITO/ZnO/P(DPPEDBTT):PC<sub>70</sub>BM(1:1)/MoO<sub>3</sub>/Ag organic photovoltaic devices with different DIO content. (c) Current density vs. voltage characteristics of ITO/ZnO/P(IDEDBTT):PC<sub>70</sub>BM(1:1)/MoO<sub>3</sub>/Ag organic photovoltaic devices with different additives.

**Table S1** Photovoltaic properties of the PSCs for simple device and inverted device with several ratio of DIO

| <b>Polymer : PC<sub>60</sub>BM<br/>(1:1)</b>                         | <b>V<sub>oc</sub><br/>(V)</b> | <b>J<sub>sc</sub><br/>(mA / cm<sup>2</sup>)</b> | <b>FF</b> | <b>PCE<br/>%</b> |
|----------------------------------------------------------------------|-------------------------------|-------------------------------------------------|-----------|------------------|
| <b>ITO/PEDOT:PSS/polymer:PC<sub>60</sub>BM(1:1)/Al</b>               |                               |                                                 |           |                  |
| <b>P(DPPEDBTT)</b>                                                   | 0.32                          | 1.38                                            | 0.42      | 0.19             |
| <b>P(IDEDBTT)</b>                                                    | 0.59                          | 2.18                                            | 0.30      | 0.39             |
| <b>P(TPDEDBTT)</b>                                                   | 0.50                          | 0.90                                            | 0.35      | 0.16             |
| <b>ITO/ZnO/P(DPPEDBTT):PC<sub>70</sub>BM(1:1)/MoO<sub>3</sub>/Ag</b> |                               |                                                 |           |                  |
| <b>DIO ratio<br/>(%)</b>                                             |                               |                                                 |           |                  |
| <b>2</b>                                                             | 0.25                          | 12.89                                           | 0.31      | 0.98             |
| <b>3</b>                                                             | 0.28                          | 12.20                                           | 0.36      | 1.20             |
| <b>4</b>                                                             | 0.23                          | 13.24                                           | 0.36      | 1.10             |
| <b>ITO/ZnO/P(IDEDBTT):PC<sub>70</sub>BM(1:1)/MoO<sub>3</sub>/Ag</b>  |                               |                                                 |           |                  |
| <b>Additive<br/>3% ratio</b>                                         |                               |                                                 |           |                  |
| <b>DIO</b>                                                           | 0.73                          | 11.75                                           | 0.27      | 2.36             |
| <b>Chloronaphthalene</b>                                             | 0.74                          | 10.25                                           | 0.26      | 1.98             |

## 2. Absorption Coefficient spectra

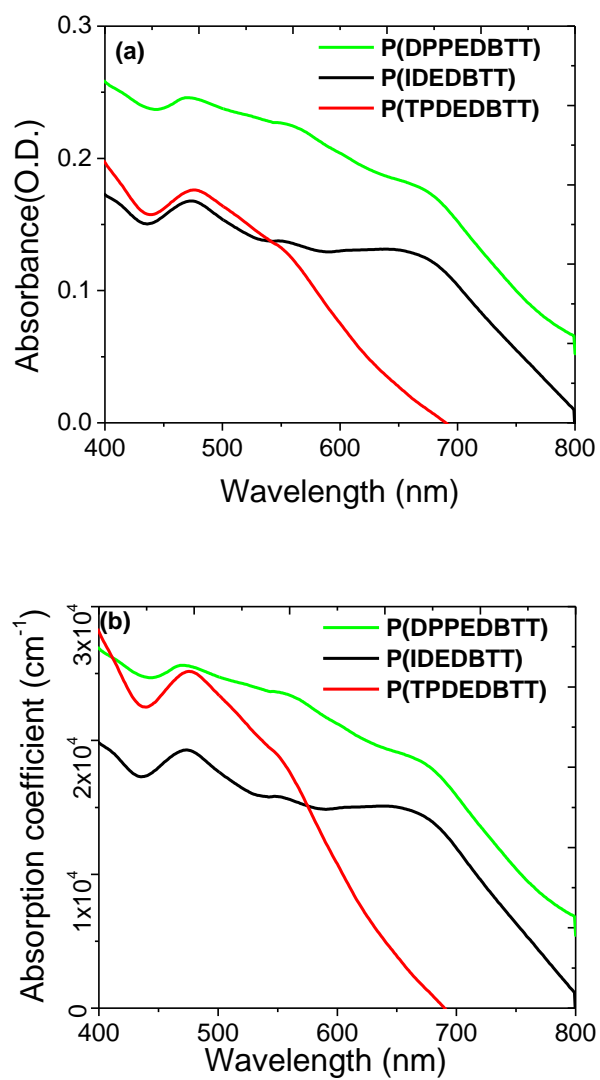

**Figure S2.** The BJJ films absorption spectra (a) and the corresponding absorption coefficient spectra (b).

### 3. $^1\text{H}$ and $^{13}\text{C}$ NMR spectra of Monomer

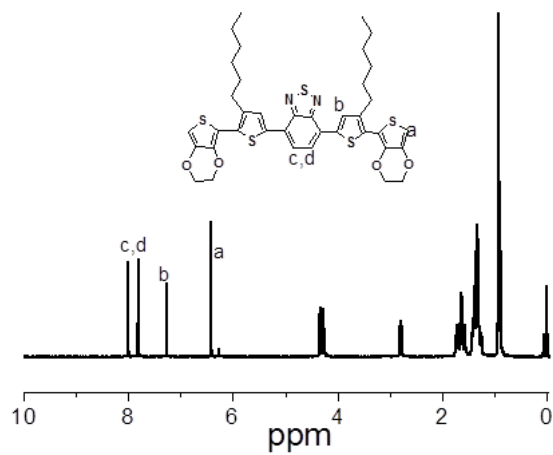

Figure S3.  $^1\text{H}$  NMR spectrum of Compound 3.

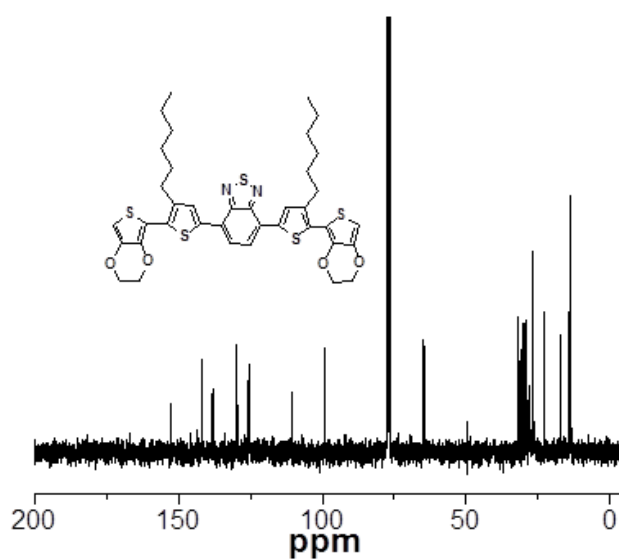

Figure S4.  $^{13}\text{C}$  NMR spectrum of Compound 3.

#### 4. $^1\text{H}$ NMR spectra of polymers

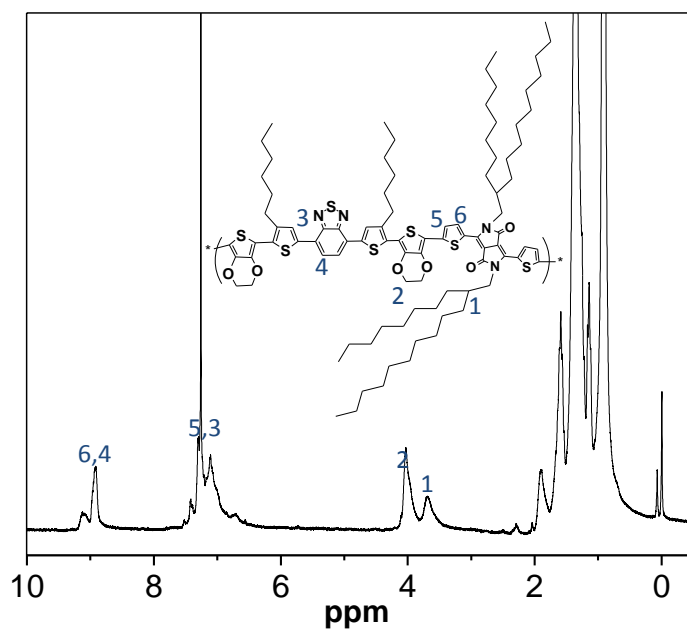

Figure S5.  $^1\text{H}$  NMR spectrum of P(DPPEDBTT).

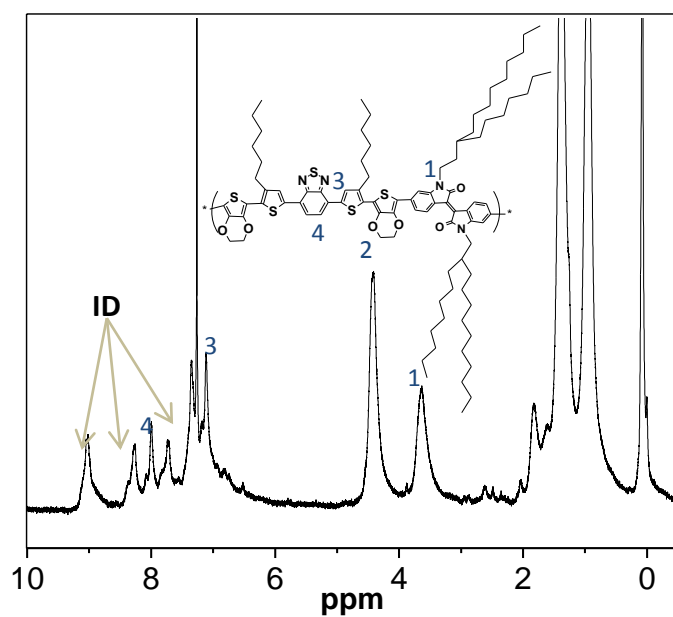

Figure S6.  $^1\text{H}$  NMR spectrum of P(IDEDBTT).

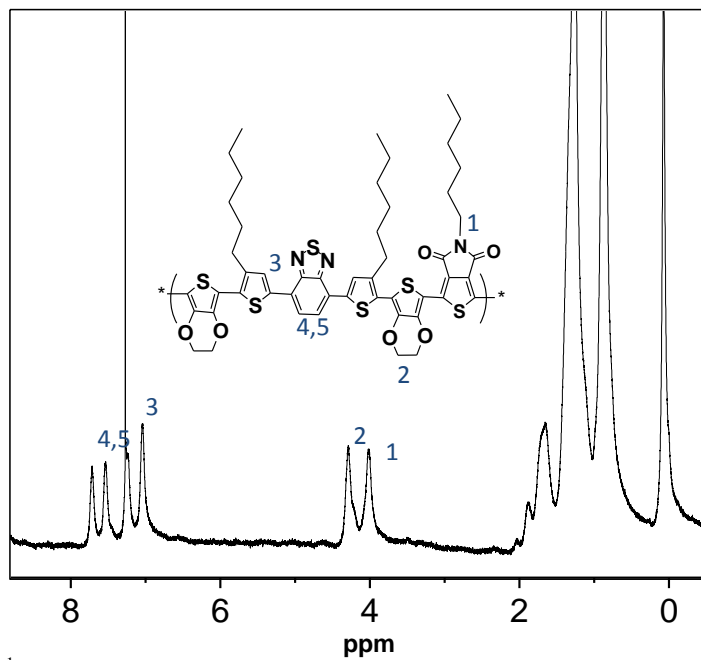

Figure S7. <sup>1</sup>H NMR spectrum of P(TPDEDBTT).
